# Supplementary material
Source: PubMed Central journal article supplement (PMC2630086)
Supplement: 0812143106_0812143106SI.pdf [file 0812143106_0812143106SI.pdf]

# Supporting Information

Nenninger *et al.* 10.1073/pnas.0812143106

## SI Text

**Strains, Plasmids and Growth Conditions.** The *csgF**csgA* mutant was constructed using the Lambda red system to delete *csgA* (primers: *csgA* RED P1, *csgA* RED P2) in MHR592 (*csgF*) to create NDH58 (1). The resistance cassette was removed using flp-mediated excision. PCR was used to verify gene deletion. The pLR8 plasmid was created by amplifying *csgB* (primers: *csgB* F NcoI, pLR8 R PstI) from MC4100 and inserting it into the NcoI/PstI sites of pLR1. pAN23 was created by amplifying *csgF* without the predicted signal sequence (*mcsG*) (primers: *mcsG* F NdeI, *csgF* R HindIII) from MC4100 and inserting it into the NdeI/HindIII sites of a pET28 vector, which adds an N-terminal His-tag and thrombin cleavage site (P. Ghosh laboratory, University of California at San Diego). pLR73 contains *csgF* inserted into the NcoI/PstI sites of pLR1; pLR75 contains *csgF* inserted into the SacI/PstI sites of pBAD33 (2). GenBank accession numbers for the sequences of these plasmid inserts are: pLR73, EU199782; and pLR75, EU199783. YESCA agar, per liter: 10g Casamino acids, 1g yeast extract, 20g agar; for CR plates, add 50  $\mu$ g/ml Congo red.

**Production of Polyclonal Serum Against His-mCsgF.** For expression and purification of a his-tagged, mature form of CsgF (His-mCsgF), *E. coli* strain BL21(DE3) harboring pAN23 was grown in a 5L fermentor with 50  $\mu$ g/ml kanamycin to OD<sub>600</sub> 3.0 before induction with 0.15 mM IPTG for 1 h. His-mCsgF was recovered from the cytoplasmic fraction and affinity purified using Talon metal affinity resin (Clontech) and Q column resin (GE Healthcare). Affinity purified His-mCsgF was further concentrated (Millipore concentrators) and purified by SDS/PAGE; the major 15 kDa band was cut from the gel and sent to SigmaGenosys for rabbit immunization. The specificity for CsgF was confirmed by immunoblot analysis.

**Immunoblot Analysis.** For whole cell immunoblot, bacteria were scraped from YESCA plates, resuspended in PBS, and normalized by OD<sub>600</sub>. A cell suspension volume corresponding to 1 optical density unit (ODU = 1 ml of OD<sub>600</sub> = 1.0) was collected

for each sample (i.e., whole cells + PBS, so that no protein was lost by pelleting of the bacteria and aspiration of PBS; these volumes were in the 15–30  $\mu$ l range). For non-FA-treated samples, cell suspensions were brought to 200  $\mu$ l using SDS loading buffer. For FA-treated samples, FA was added to cell suspensions to 70%, the acid evaporated in a vacuum centrifuge, the pellet resuspended in 200- $\mu$ l SDS sample buffer, and pH adjusted with 1N NaOH, if necessary. For plug samples, a circular plug (d = 8 mm) was cut from the agar and collected. Plus/minus FA treatment of plugs was as above for whole cells, except that FA-treated plugs were solubilized in 100  $\mu$ l of 96% FA. All samples were boiled for 5 min before SDS/PAGE in 15% acrylamide gels; resolved proteins were transferred to nitrocellulose membrane overnight at 4 °C at 12V in 25-mM CAPS, pH 11.2. Blocking: 4 °C overnight, rocking in 1 $\times$  TBST, 1.5% milk, 1.5% BSA. Primary antibody: RT 1h at 1:5,000 dilution in blocking buffer (exception: CsgB anti-sera used at 1:2,000 dilution). Horseradish peroxidase conjugated secondary antibody (Pierce): RT 1 h at 1:10,000 dilution in blocking buffer. Detection: Supersignal West Femto chemiluminescent substrate (Pierce).

**Immunofluorescence Microscopy.** Intact cells were scraped from YESCA agar and normalized by OD<sub>600</sub> as described above. Of each strain, 0.5 ODU was fixed in 5% formalin for 30 min, spun onto polylysine coated glass slides, washed in filter-sterile PBS, and blocked in PBST + 2% BSA for 45 min at RT. Slides were washed 3 times for 5 min in filter-sterile PBS then stained with a 1:5,000 dilution polyclonal rabbit  $\alpha$ -CsgF serum (or PBS-negative control) for 1 h at RT; slides were washed 3 times for 5 min in filter-sterile PBS; secondary staining used a 1:1,000 dilution of FITC conjugated goat  $\alpha$ -rabbit antibody (Molecular Probes), incubated for 1 h at RT; slides were washed 5 times for 5 min in filter-sterile PBS, the fourth wash included Hoescht dye. Cells were also probed with the  $\alpha$ -CsgF antibody by a whole cell batch procedure before fixation with 5% formalin, with similar results. Slides were visualized on a Zeiss Axioskope Fluorescence microscope.

1. Datensko KA, Wanner BL (2000) One-step inactivation of chromosomal genes in *Escherichia coli* K-12 using PCR products. *Proc Natl Acad Sci USA* 97:6640–6645.
2. Guzman LM, Belin D, Carson MJ, Beckwith J (1995) Tight regulation, modulation, and high-level expression by vectors containing the arabinose PBAD promoter. *J Bacteriol* 177:4121–4130.

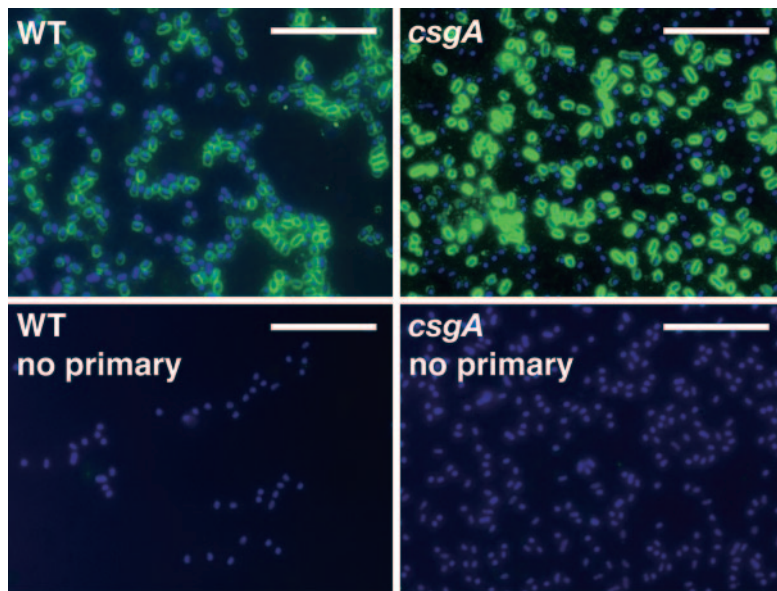

**Fig. S1.** CsgF localization. Whole cells of wild type (WT, MC4100) and *csgA* (LSR10) probed with rabbit polyclonal  $\alpha$ -CsgF antibody or PBS (no primary), then FITC conjugated goat  $\alpha$ -rabbit antibody. Each image is an overlay of the FITC channel (*green*, CsgF) and the DAPI channel (*blue*, DNA, Hoechst dye). (Scale bars: 10  $\mu$ m.)



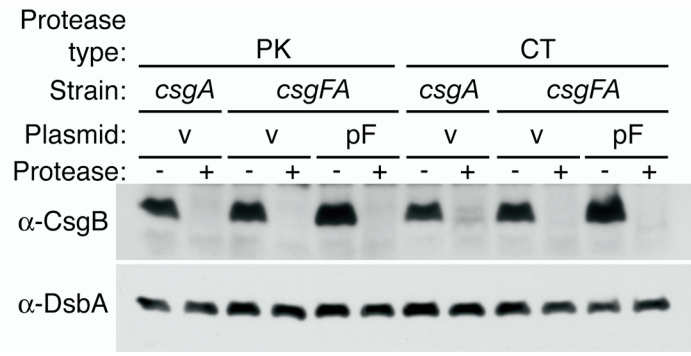

**Fig. S3.** CsgB is extracellular in all strains in Fig. 5. Whole cells of *csgA/v* (LSR10/pLR1), *csgFcsgA/v* (NDH58/pLR1), and *csgFcsgA/pF* (NDH58/pLR73) were collected after 48 h of growth on YESCA agar. Whole cells were treated with 0 or 10  $\mu$ g/ml of proteinase K (PK) or chymotrypsin (CT), and then analyzed by  $\alpha$ -CsgB immunoblot. An  $\alpha$ -DsbA immunoblot was used as a positive control for cell integrity. v, empty matched vector.



**Table S2. Primer sequences used to make knock-out strains and plasmids**

| Primer /gene   | Sequence (5'→3')                                                    |
|----------------|---------------------------------------------------------------------|
| csgA RED P1    | CCATTCGACTTTTAAATCAATCCGATGGGGGTTTTACATGAAACTTGTGTGTAGGCTGGGCTGCTTC |
| csgA RED P2    | GGGCTTGCGCCCTGTTTCTGTAATACAAATGATGTATTAGTACTGCATATGAATATCCTCCTTAG   |
| csgB F NcoI    | gtttccATGgcgAAAAACAAATTGTTATTTATGATG                                |
| pLR8 R PstI    | gtttctgcagTTAACGCTGTGTCACGCGAATAGCCATTTGC                           |
| mcsGF F NdeI   | GGAATTCATATGGGAACCATGACTTCCAGTCCGT                                  |
| csgF R HindIII | CGCCAAGCTTTTAAAAATCGGTTGACTTATTTTGAAACC                             |
